# Supplementary material for: Amyloid precursor protein as a fibrosis marker in infants with biliary atresia
Source: Springer Nature journal article supplement (doi:10.1038/s41390-024-03582-w), 2024-09-28
Supplement: MOESM1 [file 41390_2024_3582_MOESM1_ESM.pdf]

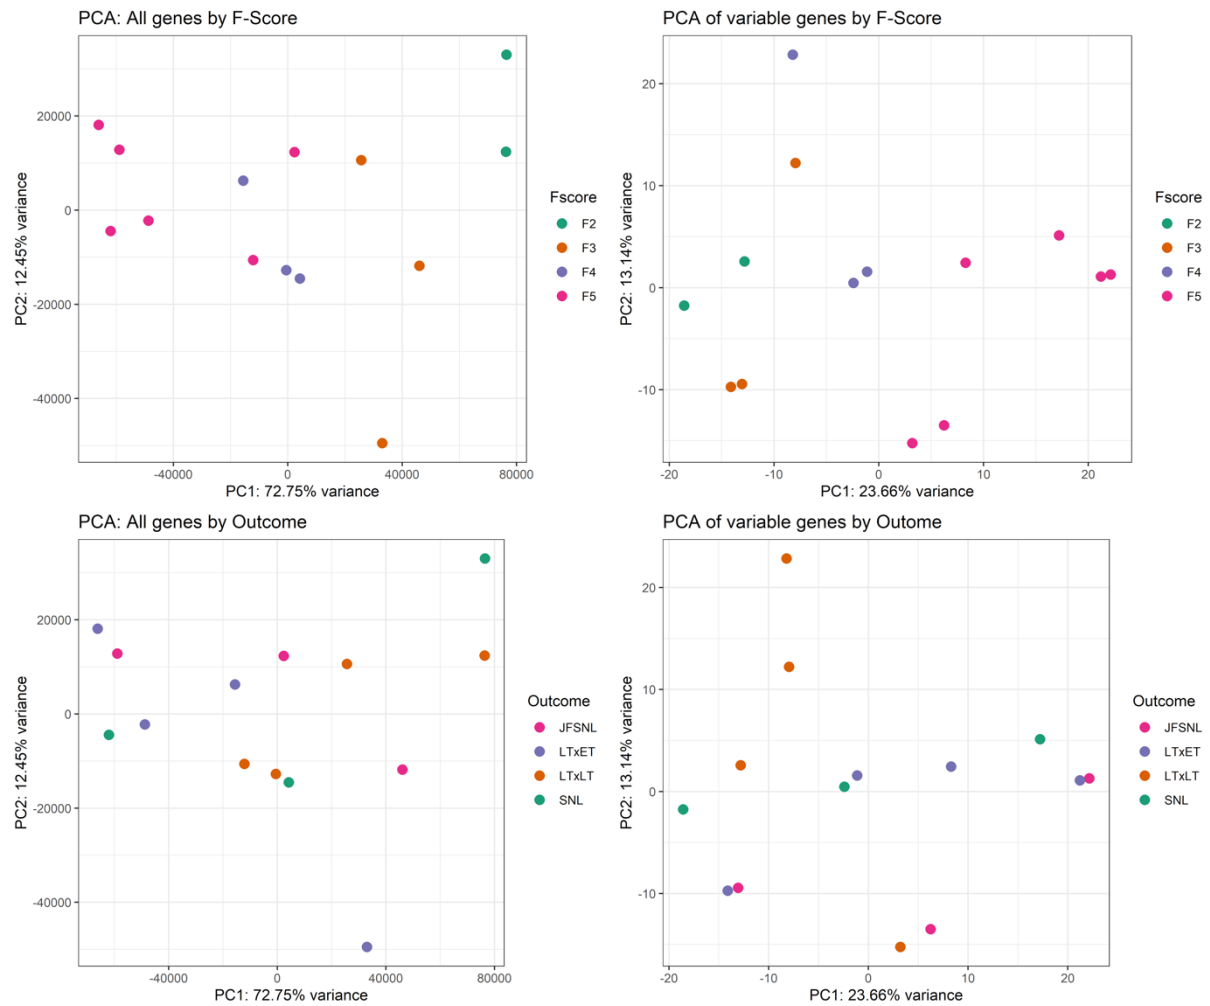

**Figure S1.** Principal component analysis (PCA) showed an excellent clustering of groups with different fibrosis levels (F2, F3, F4, F5), while different clinical outcome groups (jaundice-free and survival with native liver, JFSNL; lung transplant at early time point, LTxET; lung transplant at late time point, LTxLT; survival with native liver, SNL) did not show any perceptible clustering.
